# Supplementary material for: Bifunctional folic-conjugated aspartic-modified Fe3O4 nanocarriers for efficient targeted anticancer drug delivery
Source: Royal Society of Chemistry journal article supplement (doi:10.1039/d1ra08776b), 2022-01-01
Supplement: d1ra08776b1.pdf [file d1ra08776b1.pdf]

## Bifunctional folic-conjugated aspartic-modified $\text{Fe}_3\text{O}_4$ nanocarriers for efficient targeted anticancer drug delivery

Munawar Khalil<sup>1\*</sup>, Ely Arina Haq<sup>1</sup>, Astari Dwiranti<sup>2</sup>, Eka Sunarwidhi Prasedya<sup>3,4</sup>, Yoshitaka Kitamoto<sup>5</sup>

<sup>1</sup>Department of Chemistry, Faculty of Mathematics and Natural Sciences, Universitas Indonesia, 16424 Depok, West Java, Indonesia.

<sup>2</sup>Cellular and Molecular Mechanism in Biological System (CEMBIOS) Research Group, Department of Biology, Faculty of Mathematics and Natural Sciences, Universitas Indonesia, 16424 Depok, West Java, Indonesia

<sup>3</sup>Department of Biology, Faculty of Mathematics and Natural Sciences, Universitas Mataram, 83125 Lombok, West Nusa Tenggara, Indonesia.

<sup>4</sup>Bioscience and Biotechnology Research Center, Faculty of Mathematics and Natural Sciences, University of Mataram, 83125 Lombok, West Nusa Tenggara, Indonesia.

<sup>5</sup>Department of Materials Science and Engineering, School of Materials and Chemical Technology, Tokyo Institute of Technology, Yokohama 226-8503, Japan.

\*Corresponding author: mkhalil@sci.ui.ac.id

### Supplementary Information

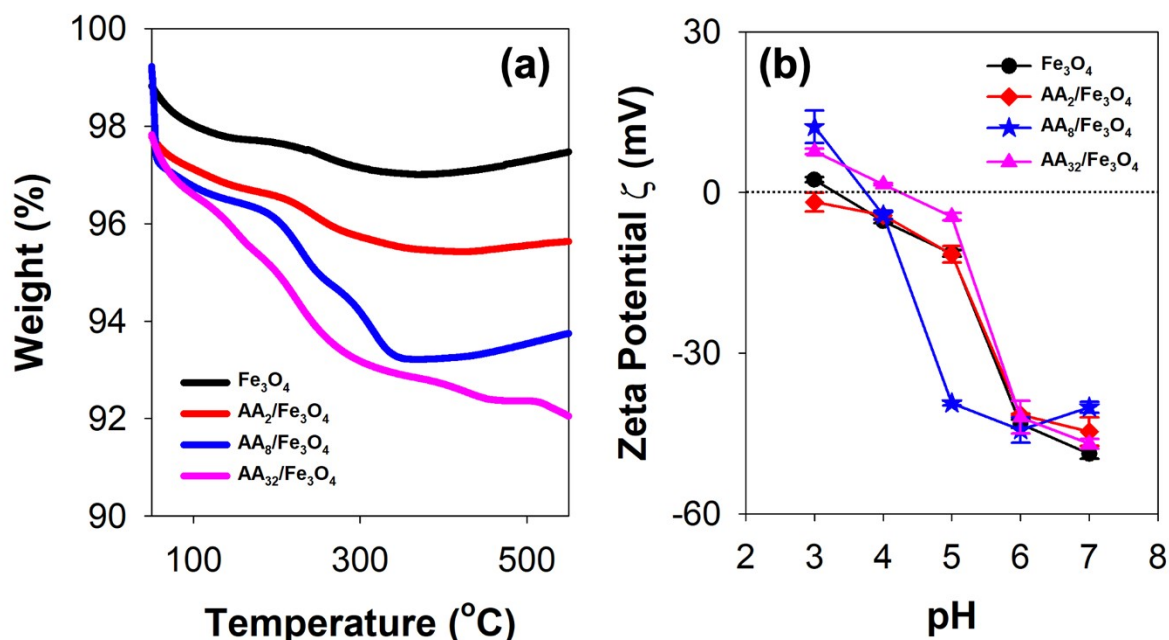

Figure S1. (a) TGA curves, and (b) zeta potential ( $\zeta$ ) values at various pH for the unmodified  $\text{Fe}_3\text{O}_4$  and the corresponding  $\text{Fe}_3\text{O}_4/\text{AA}_2$ ,  $\text{Fe}_3\text{O}_4/\text{AA}_8$ , and  $\text{Fe}_3\text{O}_4/\text{AA}_{32}$  nanoparticles, respectively.

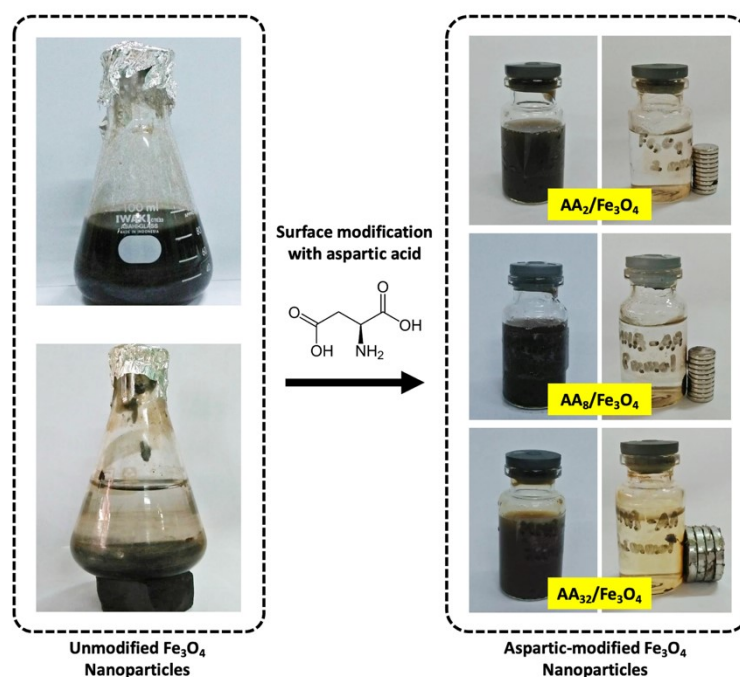

Figure S2. Photograph of unmodified and aspartic-modified  $\text{Fe}_3\text{O}_4$  without and with the influence of external permanent magnet.

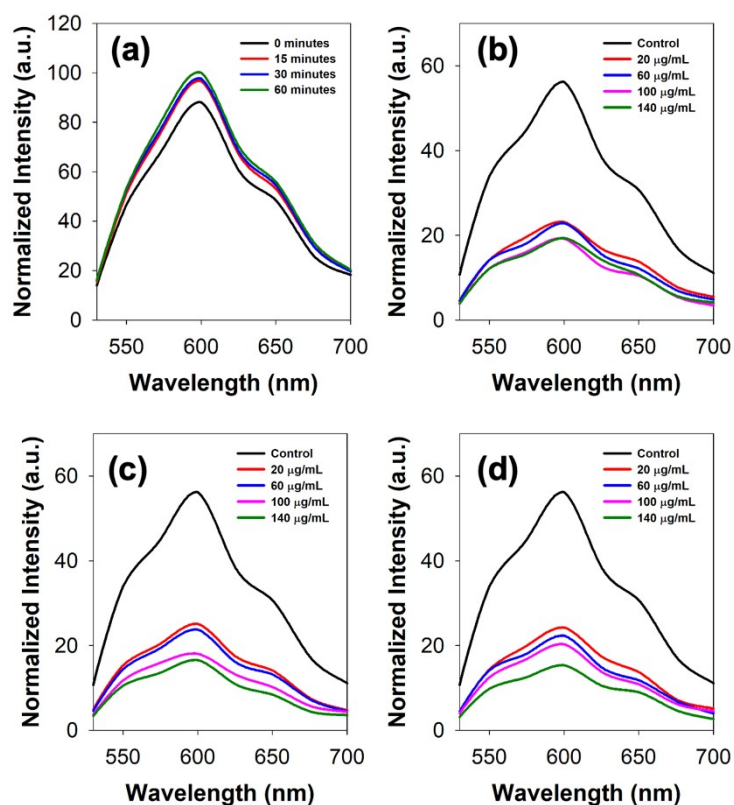

Figure S3. Normalized fluorescence spectra of (a) pure DOX at different time intervals, and (b-d) DOX after loading at various concentrations of FA/AA<sub>2</sub>/Fe<sub>3</sub>O<sub>4</sub>, FA/AA<sub>8</sub>/Fe<sub>3</sub>O<sub>4</sub>, and FA/AA<sub>32</sub>/Fe<sub>3</sub>O<sub>4</sub> nanoparticles, respectively.

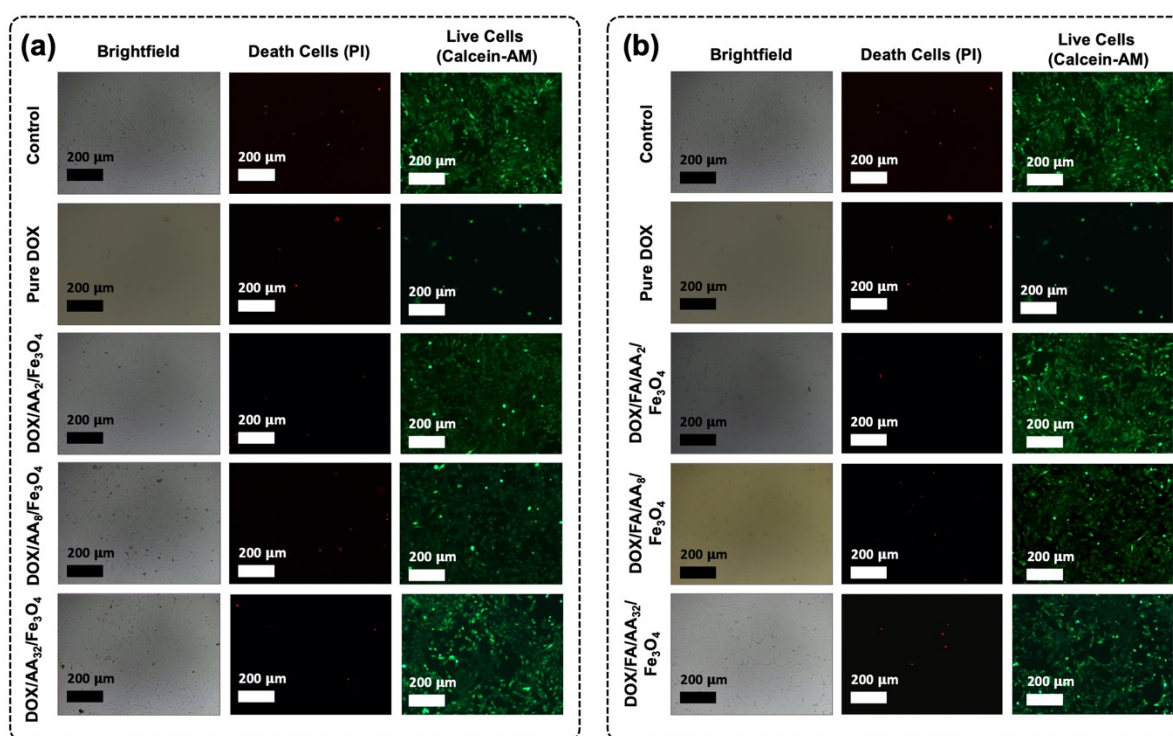

Figure S4. Fluorescence microscopy images of NIH-3T3 normal murine fibroblasts before and after incubation of (a) pure DOX and DOX/AA/Fe<sub>3</sub>O<sub>4</sub>, and (b) pure DOX and DOX/FA/AA/Fe<sub>3</sub>O<sub>4</sub> at their IC<sub>50</sub> concentration.

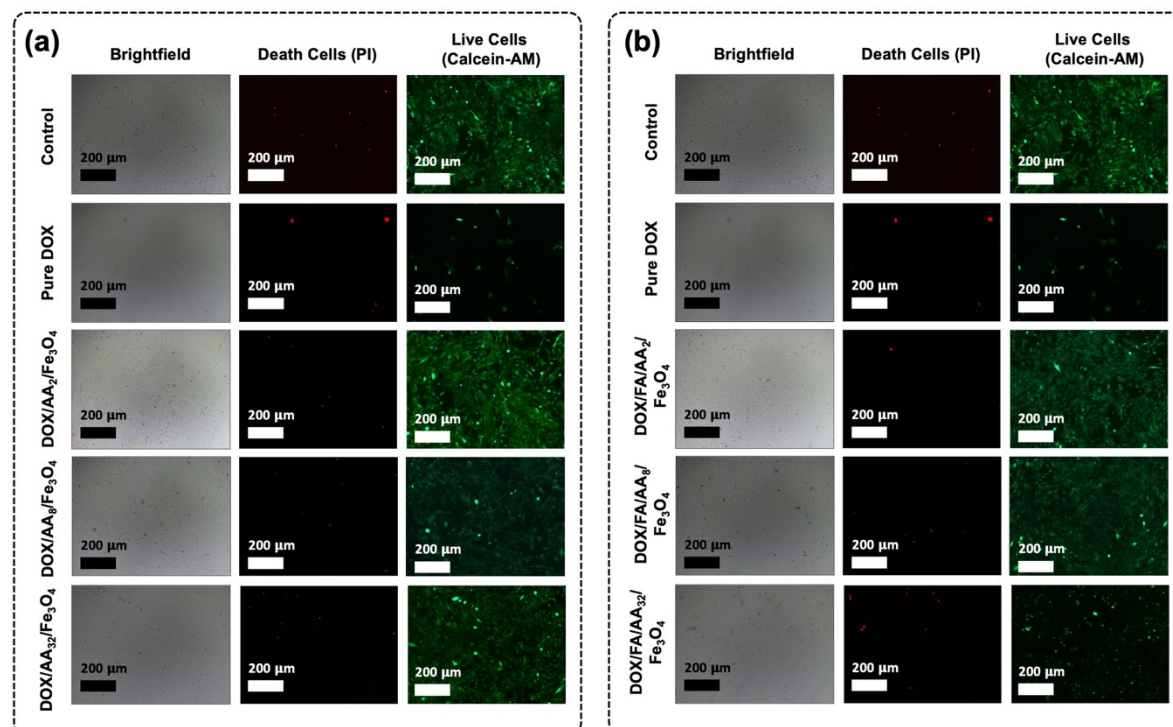

Figure S5. Fluorescence microscopy images of NIH-3T3 normal murine fibroblasts before and after incubation of (a) pure DOX and DOX/AA/Fe<sub>3</sub>O<sub>4</sub>, and (b) pure DOX and DOX/FA/AA/Fe<sub>3</sub>O<sub>4</sub> at concentration of 20 μg/mL.
